# Supplementary material for: In situ Ga K-edge XANES study of Ga-exchanged zeolites at high temperatures under different atmospheres including vacuum, CO, and pressurized H2
Source: Royal Society of Chemistry journal article supplement (doi:10.1039/d3cy01250f), 2023-01-01
Supplement: d3cy01250f1.pdf [file d3cy01250f1.pdf]

In situ Ga K-edge XANES study of Ga-exchanged zeolites at high temperatures under different atmospheres including vacuum, CO, and pressurized H<sub>2</sub>

Mengwen Huang<sup>1</sup>, Tetsuya Kinjyo<sup>2</sup>, Shunsaku Yasumura<sup>1</sup>, Takashi Toyao<sup>2</sup>, Daiju Matsumura<sup>3</sup>, Hiroyuki Saito<sup>4</sup>, Ken-ichi Shimizu<sup>1</sup>, Norikazu Namiki<sup>2</sup>, Zen Maeno<sup>2</sup>

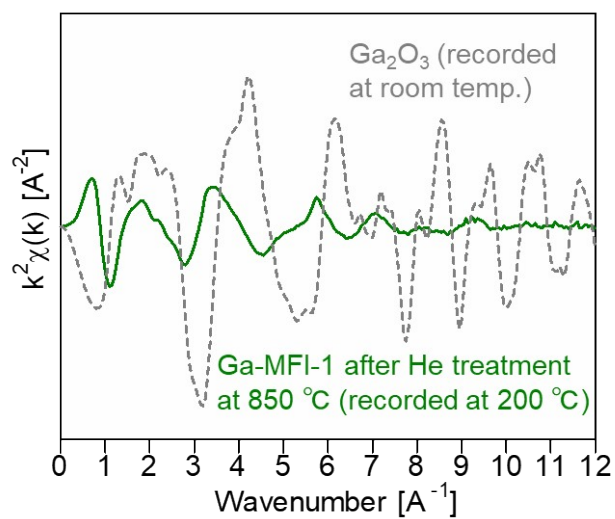

Figure S1.  $k^2$ -Weighted EXAFS oscillations of Ga-MFI-1 after He treatment (recorded at 200 °C) and  $\text{Ga}_2\text{O}_3$  (recorded at room temperature).

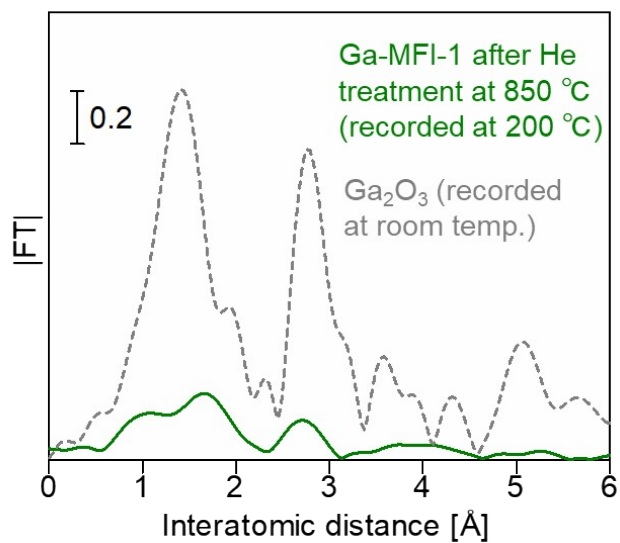

Figure S2. FT-EXAFS spectra of Ga-MFI-1 after He treatment (recorded at 200 °C) and  $\text{Ga}_2\text{O}_3$  (recorded at room temperature). The spectra were not corrected for phase shift.

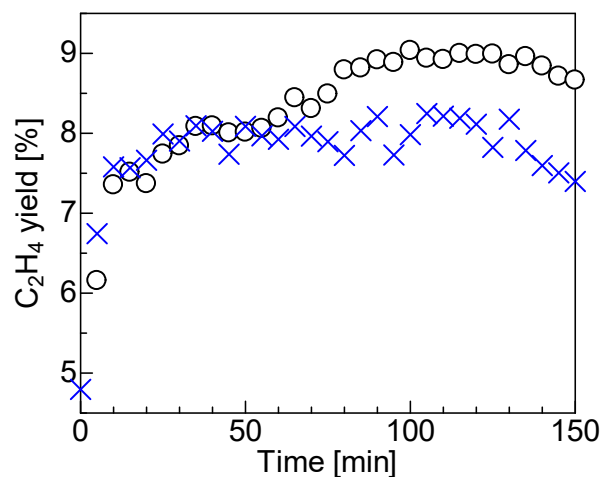

Figure S3. Comparison of time course of  $C_2H_4$  yield in EDH over CO-treated Ga-MFI-1 (black) and Ar-treated Ga-MFI-1 (blue) at 600 °C. For CO-treated Ga-MFI-1, the oxidized Ga-MFI-1 was pretreated with 10% CO/Ar at 700 °C and then used for the EDH reaction. For Ar-treated Ga-MFI-1, the fresh Ga-MFI-1 prepared by RSSIE under  $H_2$  flow was treated with Ar at 800 °C and then used for the reaction.

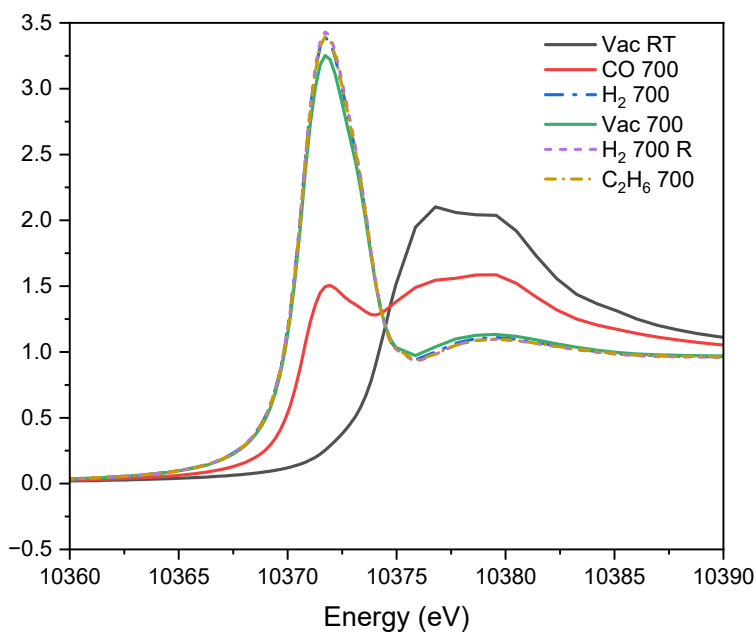

Figure S4. *In situ* Ga K-edge XAS spectra of Ga-MOR-1 obtained under various conditions including CO atmosphere. All the spectra were obtained at 700 °C, except for the first spectrum (black) was taken under room temperature.

Table S1.  $\Delta Ab_{\max}$ , relative amount of Ga-hydrides, and steady-state activity for Ga-exchanged zeolites with different-type frameworks

| Sample   | $Ab_{\max}$ in vacuum <sup>[a]</sup> | $Ab_{\max}$ in $C_2H_6$ <sup>[a]</sup> | $\Delta Ab_{\max}$ <sup>[b]</sup> | Negative IR intensity <sup>[c]</sup><br>(index of relative amount of Ga-hydrides) | $C_2H_4$ yield <sup>[d]</sup><br>(index of steady-state activity) |
|----------|--------------------------------------|----------------------------------------|-----------------------------------|-----------------------------------------------------------------------------------|-------------------------------------------------------------------|
| Ga-MFI-1 | 2.76                                 | 3.21                                   | 0.45                              | 0.059                                                                             | 38.2%                                                             |
| Ga-MOR-1 | 3.25                                 | 3.40                                   | 0.15                              | 0.014                                                                             | 19.0%                                                             |
| Ga-CHA-1 | 3.10                                 | 3.21                                   | 0.11                              | 0.003                                                                             | 11.2%                                                             |

[a] Obtained from in situ Ga K-edge XANES spectra (recorded at 700 °C). [b] Calculated by subtraction of  $Ab_{\max}$  in vacuum from that in  $C_2H_6$ . [c] The negative intensity at 2050  $cm^{-1}$  in IR spectra (recorded at 50 °C) after H-D exchange reaction of  $H_2$ -treated Ga-exchanged zeolites under  $D_2$  flow at 200 °C (ref 26). [d]  $C_2H_4$  yield after 3 h in nonoxidative ethane dehydrogenation using  $H_2$ -treated Ga-exchanged zeolites at 660 °C (ref 26).
